# Supplementary material
Source: Springer Nature journal article supplement (https://www.springermedizin.de/resource/supplementary/12885_2007_1116_MOESM8_ESM.pdf/9471154)

n-fold CXCR2 mRNA expression related to matched normal tissue

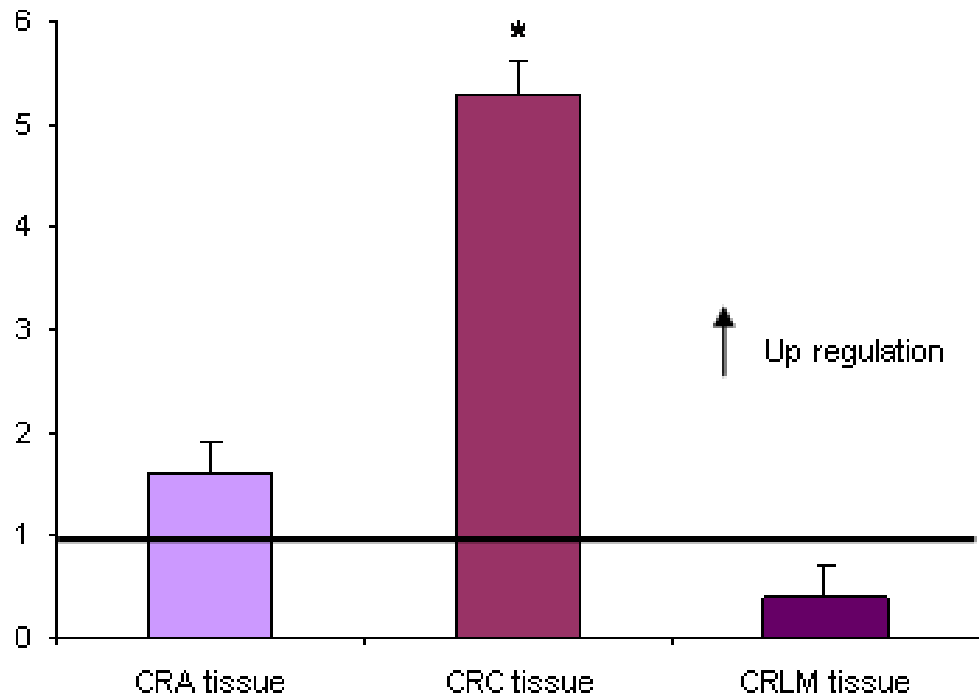

Supplement: MOESM8 [file 9471154]
